# Supplementary material for: Response of soil nutrients and erodibility to slope aspect in the northern agro-pastoral ecotone, China
Source: Copernicus journal article supplement (doi:10.5194/egusphere-2023-1006), 2023-06-12

**Table S1** Understory vegetation characteristics of different vegetation types at different slope aspect. Values are in the form of the mean  $\pm$  standard error. Different capital letters indicate significant differences between slope aspects ( $p < 0.05$ ), different lowercase letters indicate significant differences between the four vegetation types ( $p < 0.05$ ).

| Slope aspect | Land use      | Site code | Dominated plant communities      | Dominant herbaceous plant                                    | Biomass height (m)    | Richness              | Biomass coverage (%)    | Aboveground biomass (g m <sup>-2</sup> ) | Belowground biomass (g m <sup>-2</sup> ) | Litter biomass (g m <sup>-2</sup> ) |
|--------------|---------------|-----------|----------------------------------|--------------------------------------------------------------|-----------------------|-----------------------|-------------------------|------------------------------------------|------------------------------------------|-------------------------------------|
| W            | Degraded land | WDAA      | <i>Artemisia annua</i>           | <i>Potentilla chinensis</i> , <i>Artemisia annua</i>         | 0.24 $\pm$ 0.02a<br>A | 0.71 $\pm$ 0.0<br>4aA | 20.11 $\pm$ 6.8<br>8bA  | 55.94 $\pm$ 3.52a<br>B                   | 26.48 $\pm$ 4.39b<br>B                   | 54.49 $\pm$ 4.42<br>dA              |
|              | grassland     | WGAM      | <i>Astragalus melilotoides</i>   | <i>Astragalus melilotoides</i>                               | 0.45 $\pm$ 0.08a<br>A | 1.15 $\pm$ 0.0<br>2aA | 49.42 $\pm$ 20.<br>53aA | 270.88 $\pm$ 56.1<br>1aB                 | 39.19 $\pm$ 22.50<br>aB                  | 96.92 $\pm$ 24.6<br>3cA             |
|              |               | WGCP      | <i>Capillipedium parviflorum</i> | <i>Capillipedium parviflorum</i>                             | 0.55 $\pm$ 0.11a<br>A | 1.12 $\pm$ 0.0<br>9aA | 47.61 $\pm$ 24.<br>66aA | 253.4 $\pm$ 30.09a<br>B                  | 73.92 $\pm$ 17.54<br>aB                  | 96.45 $\pm$ 17.5<br>0cA             |
|              | shrubland     | WSHR      | <i>Hippophae rhamnoides</i>      | <i>Artemisia sacrorum</i> , <i>Capillipedium parviflorum</i> | 0.54 $\pm$ 0.17a<br>A | 1.14 $\pm$ 0.0<br>6aA | 28.67 $\pm$ 4.7<br>3bA  | 236.15 $\pm$ 36.5<br>7aB                 | 26.61 $\pm$ 9.87b<br>B                   | 141.5 $\pm$ 10.9<br>9aA             |
|              |               | WSCK      | <i>Caragana korshinskii</i>      | <i>Artemisia sacrorum</i> , <i>Capillipedium parviflorum</i> | 0.67 $\pm$ 0.39a<br>A | 1.13 $\pm$ 0.0<br>2aA | 30.94 $\pm$ 17.<br>13bA | 312.83 $\pm$ 8.12a<br>B                  | 29.65 $\pm$ 1.09b<br>B                   | 135.2 $\pm$ 10.5<br>0aA             |
|              | Woodland      | WWLG      | <i>Larix gmelinii</i>            | <i>Astragalus melilotoides</i> , <i>Artemisia sacrorum</i>   | 0.71 $\pm$ 0.05b<br>A | 1.17 $\pm$ 0.0<br>7bA | 35.27 $\pm$ 18.<br>32bA | 268.23 $\pm$ 30.2<br>1bB                 | 76.71 $\pm$ 6.07a<br>B                   | 122 $\pm$ 7.99b<br>A                |
|              |               | WWPS      | <i>Pinus sylvestris</i>          | <i>Astragalus melilotoides</i> , <i>Artemisia sacrorum</i>   | 0.63 $\pm$ 0.14b<br>A | 1.11 $\pm$ 0.0<br>4bA | 32.67 $\pm$ 13.<br>05bA | 350.14 $\pm$ 12.3<br>8bB                 | 49.17 $\pm$ 13.71<br>aB                  | 113.46 $\pm$ 7.4<br>3bA             |
| N            | grassland     | NGAM      | <i>Astragalus melilotoides</i>   | <i>Astragalus melilotoides</i>                               | 0.55 $\pm$ 0.09a<br>A | 1.02 $\pm$ 0.1<br>7aA | 37.79 $\pm$ 1.9<br>1aA  | 292.97 $\pm$ 62.3<br>2aAB                | 62.75 $\pm$ 20.67<br>aAB                 | 95.08 $\pm$ 31.9<br>0cA             |
|              |               | NGBI      | <i>Bothriochloa ischaemum</i>    | <i>Bothriochloa ischaemum</i> (L.) Keng                      | 0.56 $\pm$ 0.06a<br>A | 1.01 $\pm$ 0.1<br>7aA | 67.41 $\pm$ 1.2<br>8aA  | 282.81 $\pm$ 70.7<br>0aAB                | 79.76 $\pm$ 12.14<br>aAB                 | 89.55 $\pm$ 13.0<br>9cA             |
|              | shrubland     | NSHR      | <i>Hippophae rhamnoides</i>      | <i>Astragalus melilotoides</i> , <i>Potentilla chinensis</i> | 0.72 $\pm$ 0.06a<br>A | 1.2 $\pm$ 0.11<br>aA  | 56.78 $\pm$ 20.<br>08aA | 305.83 $\pm$ 19.1<br>1aAB                | 46.69 $\pm$ 20.66<br>aAB                 | 175.16 $\pm$ 12.<br>81aA            |

|   |           |      |                           |                                              |                 |                 |                    |                     |                    |                    |
|---|-----------|------|---------------------------|----------------------------------------------|-----------------|-----------------|--------------------|---------------------|--------------------|--------------------|
|   |           | NSCK | Caragana korshinskii      | Artemisia sacrorum,Capillipedium parviflorum | 0.41±0.05a<br>A | 1.09±0.0<br>4aA | 25.11±6.7<br>1aA   | 300.94±33.4<br>4aAB | 43.08±8.75a<br>AB  | 167.37±12.<br>24aA |
|   | Woodland  | NWLG | Larix gmelinii            | Artemisia sacrorum,Capillipedium parviflorum | 0.77±0.06a<br>A | 1.12±0.0<br>8aA | 31.79±28.<br>25aA  | 295.86±32.6<br>4aAB | 88.27±6.15a<br>AB  | 140.2±16.1<br>0bA  |
|   |           | NWPS | Pinus sylvestris          | Astragalus melilotoides                      | 0.63±0.05a<br>A | 1.13±0.0<br>2aA | 63.67±14.<br>98aA  | 411.27±49.2<br>6aAB | 47.07±9.84a<br>AB  | 130.38±14.<br>98bA |
|   | grassland | SGAM | Astragalus melilotoides   | Astragalus melilotoides                      | 0.51±0.08b<br>A | 1.12±0.0<br>1aA | 43.46±13.<br>38abA | 304.11±14.5<br>6bAB | 77.84±42.56<br>aAB | 110.62±23.<br>76cA |
|   |           | SGCP | Capillipedium parviflorum | Capillipedium parviflorum                    | 0.42±0.15b<br>A | 1.18±0.0<br>9aA | 40.55±12.<br>51abA | 276.32±63.5<br>4bAB | 76.38±49.01<br>aAB | 108.54±6.0<br>2cA  |
|   | shrubland | SSHR | Hippophae rhamnoides      | Artemisia sacrorum,Potentilla chinensis      | 0.66±0.12b<br>A | 1.19±0.1<br>1aA | 28.33±18.<br>58bA  | 397.55±19.1<br>7aAB | 56.71±6.77a<br>AB  | 207.31±14.<br>62aA |
| S |           | SSCK | Caragana korshinskii      | Capillipedium parviflorum,Lespedeza bicolor  | 0.41±0.05b<br>A | 1.1±0.03<br>aA  | 25.11±5.4<br>2bA   | 361.4±11.68a<br>AB  | 47.7±7.11aA<br>B   | 198.08±13.<br>97aA |
|   | Woodland  | SWLG | Larix gmelinii            | Artemisia sacrorum                           | 0.75±0.01a<br>A | 1.09±0.1<br>2aA | 54.67±21.<br>36aA  | 317.5±20.12a<br>AB  | 91.97±3.46a<br>AB  | 149.14±12.<br>11bA |
|   |           | SWPS | Pinus sylvestris          | Astragalus melilotoides, Artemisia sacrorum  | 0.69±0.10a<br>A | 1.1±0.11<br>aA  | 60±17.58a<br>A     | 459.27±38.9<br>2aAB | 73.73±7.92a<br>AB  | 138.7±11.2<br>7bA  |
|   | grassland | EGAS | Astragalus melilotoides   | Artemisia sacrorum                           | 0.54±0.12a<br>A | 0.9±0.06<br>aA  | 55.87±14.<br>29aA  | 337.29±56.7<br>4bA  | 109.63±18.7<br>1aA | 106.87±15.<br>61cA |
|   |           | EGSM | Astragalus melilotoides   | Artemisia sacrorum                           | 0.55±0.12a<br>A | 0.96±0.1<br>1aA | 51.75±23.<br>80aA  | 350.39±37.6<br>8bA  | 103.14±3.28<br>aA  | 114.63±2.9<br>3cA  |
| E | shrubland | ESHR | Hippophae rhamnoides      | Artemisia sacrorum,Potentilla chinensis      | 0.7±0.24aA<br>A | 1.27±0.0<br>8aA | 37.22±6.7<br>4aA   | 428.69±34.7<br>4abA | 63.33±3.28c<br>A   | 214.75±32.<br>17aA |
|   |           | ESCK | Caragana korshinskii      | Capillipedium parviflorum,Lespedeza bicolor  | 0.69±0.38a<br>A | 1.05±0.0<br>1aA | 35.42±17.<br>95aA  | 414.61±34.5<br>8abA | 49.49±13.33<br>cA  | 205.19±30.<br>74aA |

|          |      |                         |                                |                 |                 |                  |                    |                  |                   |
|----------|------|-------------------------|--------------------------------|-----------------|-----------------|------------------|--------------------|------------------|-------------------|
| Woodland | EWLG | <i>Larix gmelinii</i>   | <i>Artemisia sacrorum</i>      | 0.77±0.11a<br>A | 1.03±0.2<br>5aA | 40.1±12.9<br>0aA | 364.47±53.4<br>2aA | 92.56±5.59b<br>A | 152.01±9.1<br>7bA |
|          | EWPS | <i>Pinus sylvestris</i> | <i>Astragalus melilotoides</i> | 0.6±0.15aA      | 0.9±0.22<br>aA  | 59±13.89a<br>A   | 552.13±32.9<br>7aA | 73.8±13.84b<br>A | 141.37±8.5<br>3bA |

**Table S2** Soil characteristics of different vegetation types at different slope aspect. Values are in the form of the mean ± standard error. SWC: soil water content; SBD: soil bulk density; SOC: soil organic carbon; TN: text Normalization; TP: total phosphorus. Different capital letters indicate significant differences between slope aspects ( $p<0.05$ ), different lowercase letters indicate significant differences between the four vegetation types ( $p<0.05$ ).

| Slope aspect | Land use      | Site code | SWC (%)       | BD (g cm <sup>-3</sup> ) | Clay (%)     | Silt (%)     | Sand (%)       | pH          |
|--------------|---------------|-----------|---------------|--------------------------|--------------|--------------|----------------|-------------|
| W            | Degraded land | WDAA      | 0.08±0.03cC   | 1.63±0.03aA              | 10.25±0.23dD | 9.12±0.12bB  | 80.63±0.32abAB | 8.5±0.11aA  |
|              |               | WGAM      | 0.1±0.01bcC   | 1.58±0.01aA              | 13.63±0.09bD | 5.22±0.17cB  | 81.15±0.14aAB  | 7.6±0.19bA  |
|              | grassland     | WGCP      | 0.1±0.03bcC   | 1.66±0.03aA              | 13.19±0.09bD | 5.52±0.17cB  | 81.29±0.14aAB  | 7.44±0.19bA |
|              |               | WSHR      | 0.11±0.02abC  | 1.25±0.02bA              | 12.42±0.23cD | 8.36±0.21bB  | 79.21±0.28bAB  | 6.97±0.07cA |
|              | shrubland     | WSCK      | 0.13±0.01abC  | 1.23±0.03bA              | 12.86±0.23cD | 8.06±0.21bB  | 79.07±0.28bAB  | 6.99±0.07cA |
|              |               | WWLG      | 0.12±0.01aC   | 1.26±0.02bA              | 20.11±0.34aD | 18.77±0.43aB | 61.12±0.77cAB  | 7.53±0.02bA |
| N            | Woodland      | WWPS      | 0.16±0.01aC   | 1.24±0.01bA              | 20.55±0.26aD | 18.47±0.17aB | 60.98±0.43cAB  | 7.55±0.02bA |
|              |               | NGAM      | 0.1±0.03bBC   | 1.56±0.01aA              | 13.45±0.36bB | 7.49±0.33bC  | 79.06±0.28bA   | 7.48±0.05aB |
|              | grassland     | NGBI      | 0.1±0.01bBC   | 1.63±0.13aA              | 13.01±0.36bB | 7.79±0.33bC  | 79.2±0.28bA    | 7.33±0.05aB |
|              |               | NSHR      | 0.12±0.04abBC | 1.22±0.13bA              | 10.79±0.46cB | 7.62±1.88bC  | 81.59±1.45cA   | 6.83±0.10bB |
|              | shrubland     | NSCK      | 0.12±0.02abBC | 1.2±0.07bA               | 11.23±0.46cB | 7.32±1.88bC  | 81.45±1.45cA   | 6.85±0.10bB |
|              |               | NWLG      | 0.13±0.01aBC  | 1.25±0.07bA              | 18.38±0.08aB | 28.19±0.28aC | 53.43±0.29aA   | 7.48±0.05aB |
| S            | Woodland      | NWPS      | 0.16±0.01aBC  | 1.22±0.02bA              | 18.82±1.00aB | 27.89±0.28aC | 53.29±0.72aA   | 7.5±0.05aB  |
|              |               | SGAM      | 0.1±0.01bAB   | 1.53±0.02aB              | 14.73±0.22bC | 4.45±0.39cB  | 80.82±0.61aB   | 7.35±0.04aC |

|             |      |              |             |              |              |              |             |
|-------------|------|--------------|-------------|--------------|--------------|--------------|-------------|
|             | SGCP | 0.11±0.02bAB | 1.6±0.08aB  | 14.29±0.22bC | 4.75±0.39cB  | 80.96±0.61aB | 7.2±0.03aC  |
| shrubland   | SSHR | 0.12±0.02aAB | 1.21±0.08bB | 11.56±0.09cC | 8.03±0.15bB  | 80.42±0.24bB | 6.56±0.04bC |
|             | SSCK | 0.13±0.01aAB | 1.19±0.13bB | 12±0.09cC    | 7.73±0.15bB  | 80.28±0.24bB | 6.58±0.04bC |
| Woodland    | SWLG | 0.13±0.03aAB | 1.24±0.13bB | 20.09±0.23aC | 29.93±0.29aB | 49.98±0.13cB | 7.29±0.05aC |
|             | SWPS | 0.16±0.01aAB | 1.22±0.07bB | 20.53±0.35aC | 29.63±0.29aB | 49.84±0.62cB | 7.3±0.05aC  |
| grassland   | EGAS | 0.11±0.01aA  | 1.34±0.11aB | 13.44±0.13bA | 6.55±0.12bA  | 80.01±0.01bC | 7.16±0.02bB |
|             | EGSM | 0.11±0.02aA  | 1.41±0.12aB | 13±0.13bA    | 6.85±0.12bA  | 80.15±0.01bC | 7.01±0.01bB |
| E shrubland | ESHR | 0.11±0.01abA | 1.14±0.09bB | 10.65±1.04cA | 6.15±1.22bA  | 83.2±1.30aC  | 6.34±0.27cB |
|             | ESCK | 0.14±0.02abA | 1.12±0.05bB | 11.09±1.04cA | 5.85±1.22bA  | 83.06±1.30aC | 6.36±0.27cB |
| Woodland    | EWLG | 0.13±0.01bA  | 1.2±0.03bB  | 18.94±0.20aA | 25.01±0.22aA | 56.05±0.02cC | 7.26±0.04aB |
|             | EWPS | 0.17±0.01bA  | 1.17±0.03bB | 19.38±0.20aA | 24.71±0.22aA | 55.91±0.02cC | 7.28±0.04aB |

Profile figure 1-3

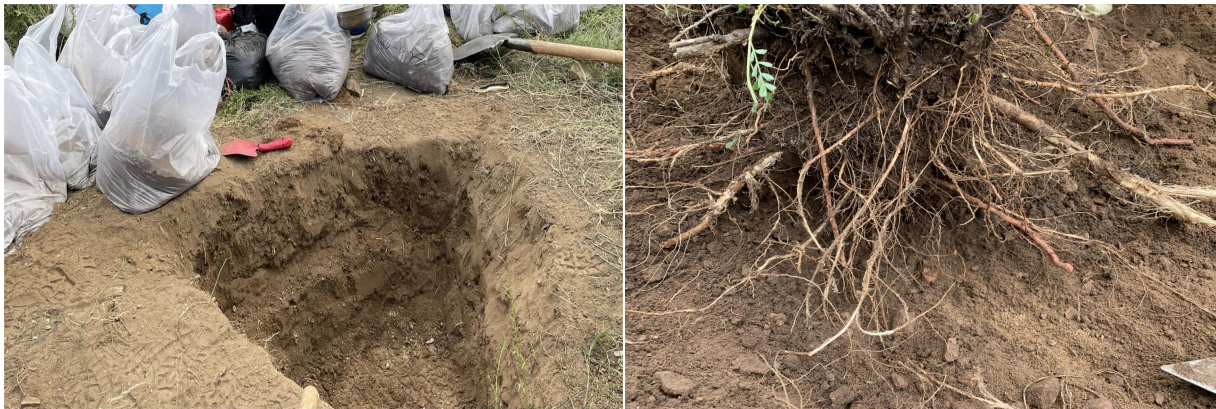

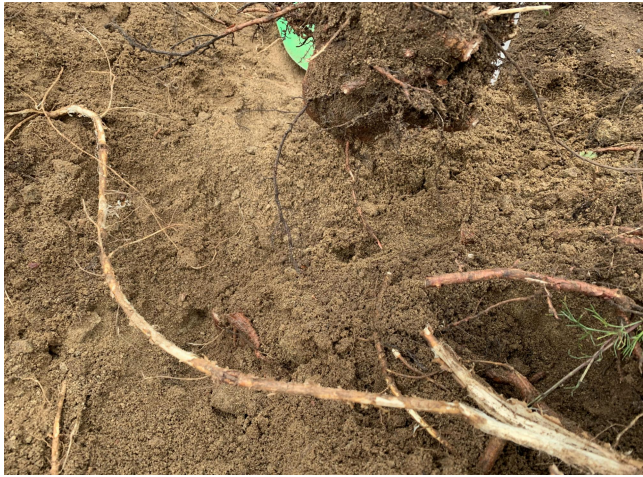

Supplement: Supplementary file [file egusphere-2023-1006-AC2-supplement.pdf]
