# Supplementary material for: Response of soil nutrients and erodibility to slope aspect in the northern agro-pastoral ecotone, China
Source: Copernicus journal article supplement (doi:10.5194/egusphere-2023-1006), 2023-06-12
Supplement: Supplementary file 1 [file Supplementary figures.docx]

**Fig. S1.** Variation of soil nutrients indicators with land use along slope aspects. D, degraded land;

G, grassland; S, shrubland; W, woodland. Different letters indicate significant differences among

different seasons at *P*<0.05 level.

**Fig. S2.** Important rank under different slope aspects. SBD, soil bulk density; Sand: sand content;

Silt: silt content; Clay: clay content.
